# Supplementary material for: Cluster Differentiating 36 (CD36) Deficiency Attenuates Obesity-Associated Oxidative Stress in the Heart
Source: PLOS journal article supplement (doi:10.1371/journal.pone.0155611), 2016-05-19
Supplement: S5 (10.1371/journal.pone.0155611.s005) [file journal.pone.0155611.s005]

## SUPPLEMENTARY DATA

**Supplementary Table 2:** List of primary antibodies used in the study.

| <b>Primary antibody</b>                                                              | <b>Antibody reference, Dilution, Manufacturer</b>                 |
|--------------------------------------------------------------------------------------|-------------------------------------------------------------------|
| Monoclonal mouse anti-mouse CD36                                                     | Antibody # ABM-5525, dilution 1:1000, Cascade (Winchester, MA),   |
| Polyclonal goat-anti-human FATP1 (cross react with mouse protein)                    | Antibody # sc-31954, dilution 1:200, Santa Cruz Biotech.          |
| Polyclonal rabbit anti-mouse Akt (cross react with mouse protein)                    | Antibody # 9272, 1:1000, Cell signaling-Millipore (Billerica, MA) |
| Polyclonal rabbit anti-mouse phospho-Akt (Ser473) (cross react with mouse protein)   | Antibody # 9271, 1:1000, Cell signaling                           |
| Polyclonal rabbit anti-human IRS1 (cross reacts with mouse protein)                  | Antibody # 2382, 1:1000, Cell signaling                           |
| Polyclonal rabbit anti-mouse phospho-IRS1 (Tyr608), (cross react with mouse protein) | Antibody # 09-432, Upstate-Millipore                              |
| Polyclonal rabbit anti-human PKC $\alpha$ (cross reacts with mouse protein)          | Antibody # 2056, Cell signaling, 1:1000                           |
| Polyclonal rabbit anti-human PKC $\delta$ (cross reacts with mouse protein)          | Antibody # 2058, dilution, 1:1000, Cell signaling                 |
| Monoclonal mouse anti-mouse p47 <sup>phox</sup>                                      | Antibody # sc-17845, dilution 1:100                               |
| Monoclonal rabbit anti-NOX2                                                          | Antibody # ab129068, dilution 1: 2500, Abcam (Cambridge, MA)      |
| Monoclonal rabbit anti-Nox4                                                          | Antibody # ab133303, dilution 1:2500, Abcam                       |
| Monoclonal mouse anti-human p67 <sup>phox</sup> cross react with mouse               | Antibody # sc-374510, 1:200, Santa Cruz Biotech.                  |
| Polyclonal rabbit anti-human p22 <sup>phox</sup> cross react with mouse              | Antibody # sc-20781, dilution 1:200, Santa Cruz                   |
| Polyclonal rabbit anti human heart-FABP (cross react with mouse protein)             | Antibody # ab102075, dilution 1:2000, Abcam                       |
| Polyclonal rabbit anti human PPAR $\alpha$ (cross react with mouse)                  | Antibody # 3585-100, dilution 1:1000, BioVision (Mountview, CA)   |

Secondary antibodies were selected according to the host of the primary antibodies. The following antibodies were used: Polyclonal rabbit anti-mouse IgG, peroxidase conjugated (sc-358923, Santa Cruz Biotech.), donkey anti-goat IgG-peroxidase conjugated (sc-2033) and goat anti-rabbit IgG-peroxidase (A0545)
